# Supplementary material for: Cambrian Furongian–Middle Ordovician conodonts in the northeastern margin of the South China Block (Chuzhou, Anhui province) and their paleogeographic implications
Source: Copernicus journal article supplement (doi:10.5194/jm-43-283-2024), 2024-08-02
Supplement: Supplementary file 1 [file jm-43-283-2024-supplement.zip]

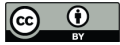

## *Supplement of*

# **Cambrian Furongian–Middle Ordovician conodonts in the northeastern margin of the South China Block (Chuzhou, Anhui province) and their paleogeographic implications**

**Bo Hu et al.**

*Correspondence to:* Shuangying Li (lsysteven@126.com) and Cheng Cheng (15555138156@163.com)

- [jm-43-283-2024-supplement-title-page.pdf](#)
- Supplements
  - [Table S1. Sample name, position, weight and rock type.xlsx](#)
  - [Table S2. Conodont elements on sample number, species and amount.xlsx](#)

The copyright of individual parts of the supplement might differ from the article licence.
